# Supplementary material for: Tunable electronic band structure and magnetic anisotropy in two-dimensional Dirac half-metal MnBr3 by external stimulus: strain, magnetization direction, and interlayer coupling
Source: Royal Society of Chemistry journal article supplement (doi:10.1039/d3cp04321e), 2023-01-01
Supplement: d3cp04321e1.pdf [file d3cp04321e1.pdf]

## Supplementary Information

### **Tunable electronic band structure and magnetic anisotropy in two-dimensional Dirac half-metal $\text{MnBr}_3$ by external stimulus: strain, magnetization direction, and interlayer coupling**

Fangyuan Xie, Zhengyu Yin, Baozeng Zhou\*, Yanhong Ding\*

Tianjin Key Laboratory of Film Electronic & Communicate Devices, School of Integrated Circuit Science and Engineering, Tianjin University of Technology, Tianjin 300384, China

\*Corresponding Authors

[baozeng@tju.edu.cn](mailto:baozeng@tju.edu.cn) (B. Zhou)

[lucydyh@163.com](mailto:lucydyh@163.com) (Y. Ding)

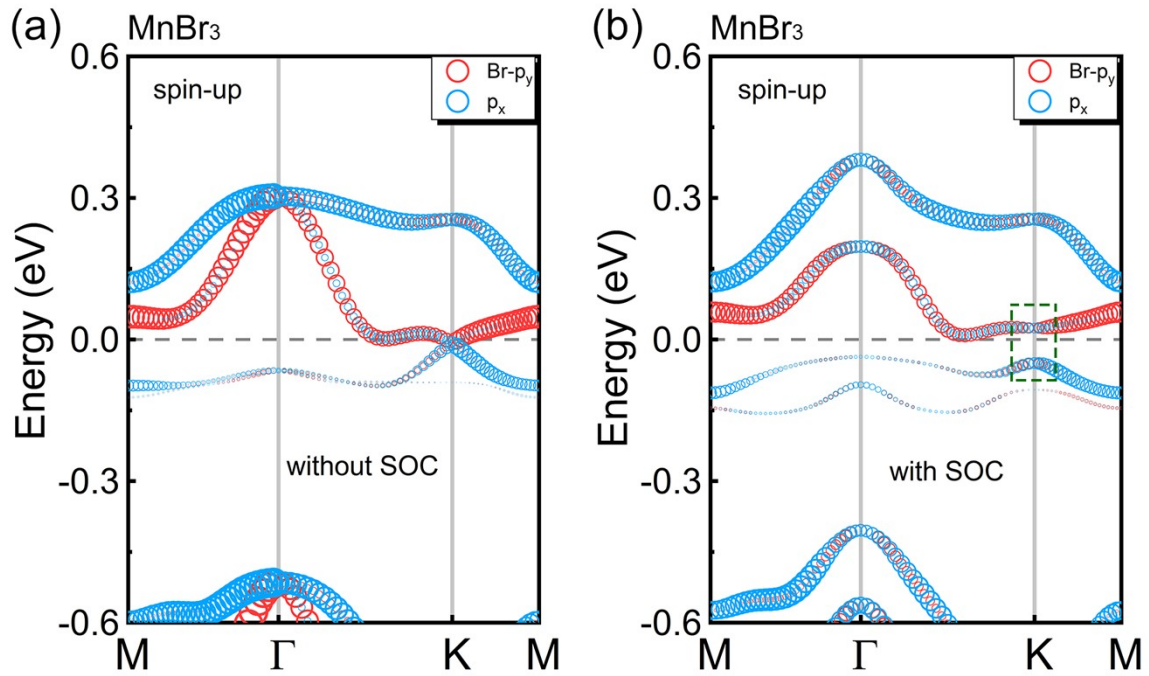

**Fig. S1.** Atomic-orbital resolved band structures of the spin-up channel in MnBr<sub>3</sub> (a) without SOC and (b) with SOC. The bubble size denotes the amplitude of the orbital-resolved character.
